# Supplementary material for: Evaluation of Polygenic Determinants of Non-Alcoholic Fatty Liver Disease (NAFLD) By a Candidate Genes Resequencing Strategy
Source: PubMed Central journal article supplement (PMC5829219; doi:10.1038/s41598-018-21939-0), 2018-02-27
Supplement: 41598_2018_21939_MOESM1_ESM.pdf [file 41598_2018_21939_MOESM1_ESM.pdf]

## Supplementary Material

### EVALUATION OF POLYGENIC DETERMINANTS OF NON-ALCOHOLIC FATTY LIVER DISEASE (NAFLD) BY A CANDIDATE GENES RESEQUENCING STRATEGY.

Di Costanzo Alessia<sup>1 \*</sup>, Belardinilli Francesca<sup>2</sup>, Bailetti Diego<sup>3</sup>, Sponziello Marialuisa<sup>1</sup>, D'Erasmus Laura<sup>1</sup>, Polimeni Licia<sup>1</sup>, Baratta Francesco<sup>1, 4</sup>, Pastori Daniele<sup>1, 4</sup>, Ceci Fabrizio<sup>5</sup>, Montali Anna<sup>1</sup>, Girelli Gabriella<sup>6</sup>, De Masi Bruna<sup>6</sup>, Angeloni Antonio<sup>2</sup>, Giannini Giuseppe<sup>2</sup>, Del Ben Maria<sup>1</sup>, Angelico Francesco<sup>7</sup>, Arca Marcello<sup>1</sup>

**Supplementary Table S1.** Number of exonic variants identified within candidate genes according to predicted effect.

|                | Exonic Variants | Non-synonymous | Nonsense | Frameshift | Synonymous |
|----------------|-----------------|----------------|----------|------------|------------|
| <i>GCKR</i>    | 14              | 8              | 2        | 1          | 3          |
| <i>LYPLAL1</i> | 9               | 6              | -        | 1          | 2          |
| <i>PPP1R3B</i> | 5               | 4              | -        | -          | 1          |
| <i>NCAN</i>    | 25              | 16             | -        | -          | 9          |
| <i>TM6SF2</i>  | 13              | 9              | -        | -          | 4          |

*GCKR*, glucokinase (hexokinase 4) regulator gene, *LYPLAL1*, Lysophospholipase Like 1 gene, *PPP1R3B*, Protein Phosphatase 1 Regulatory Subunit 3B gene, *NCAN*, Neurocan gene, *TM6SF2*, Transmembrane 6 superfamily Member 2 gene.

**Supplementary Table S2.** List of identified variants in candidate genes with evaluation of functional effect in NAFLD cases and controls.

| Genes          | Chr Position   | dbSNP ID    | Type                     | Protein change            | MAF     | NAFLD (N) | Controls (N) | Polyphen | SIFT | Provean | SNP & GO | Mut. Taster | Prob. Damaging |
|----------------|----------------|-------------|--------------------------|---------------------------|---------|-----------|--------------|----------|------|---------|----------|-------------|----------------|
| <b>GCKR</b>    | chr2:27720483  | exac        | missense                 | p.Gln91Lys                | 0.00008 | 1         | 0            | 0        | 0    | 0       | 0        | 0           |                |
| -              | chr2:27721130  | exac        | frameshift               | p.Leu101AlafsTer22        | 0.00002 | 0         | 1            | na       | na   | na      | na       | na          | yes            |
| -              | chr2:27729720  | novel       | missense                 | p.Asp345Val               | -       | 0         | 1            | 2        | 2    | 2       | 2        | 2           | yes            |
| -              | chr2:27731054  | novel       | missense                 | p.Phe453Cys               | -       | 1         | 0            | 2        | 0    | 0       | 0        | 2           |                |
| -              | chr2:27730940  | rs1260326   | missense                 | p.Leu446Pro               | 0.4108  | 175       | 178          | 0        | 0    | 0       | 0        | 0           |                |
| -              | chr2:27728609  | rs138410297 | missense                 | p.Arg259Gly               | 0.0005  | 0         | 1            | 2        | 2    | 2       | 0        | 0           | yes            |
| -              | chr2:27745372  | rs146053779 | nonsense                 | p.Arg540Ter               | 0.0011  | 0         | 1            | na       | na   | na      | na       | na          | yes            |
| -              | chr2:27726437  | rs147073127 | missense                 | p.Gln234Pro               | 0.0033  | 1         | 3            | 0        | 2    | 0       | 0        | 0           |                |
| -              | chr2:27730107  | rs201754753 | nonsense                 | p.Arg358Ter/<br>p.(R358*) | 0.0002  | 1         | 0            | na       | na   | na      | na       | na          | yes            |
| -              | chr2:27746196  | rs34792470  | missense                 | p.His590Tyr               | 0.001   | 1         | 1            | 0        | 0    | 0       | 0        | 0           |                |
| -              | chr2:27745373  | rs8179249   | missense                 | p.Arg540Gln               | 0.006   | 2         | 2            | 0        | 0    | 0       | 0        | 0           |                |
| <b>LYPLAL1</b> | chr1:219384894 | exac        | frameshift               | p.Leu181PhefsTer13        | 0.00005 | 1         | 0            | na       | na   | na      | na       | na          | yes            |
| -              | chr1:219384896 | exac        | missense                 | p.Glu180Asp               | 0       | 1         | 0            | 0        | 0    | 0       | 0        | 2           | yes            |
| -              | chr1:219366554 | novel       | missense                 | p.Glu108Lys               | -       | 0         | 1            | 2        | 2    | 2       | 2        | 2           | yes            |
| -              | chr1:219385003 | rs146719365 | missense                 | p.Thr216Ser               | 0.0005  | 1         | 0            | 0        | 0    | 0       | 0        | 0           |                |
| -              | chr1:219384945 | rs34201999  | missense                 | p.Leu197Val               | 0.00006 | 0         | 1            | 1        | 2    | 0       | 0        | 2           | yes            |
| -              | chr1:219383905 | rs940570    | missense                 | p.Ile131Met               | 0.01    | 1         | 1            | 0        | 0    | 0       | 0        | 0           |                |
| -              | chr1:219383865 | rs940571    | missense/<br>near splice | n.321-7T>C/<br>p.Phe68Leu | 0.01    | 65        | 75           | na       | na   | na      | na       | na          | yes            |
| <b>NCAN</b>    | chr19:19335209 | novel       | missense                 | p.Tyr249His               | -       | 1         | 0            | 2        | 2    | 2       | 2        | 2           | yes            |
| -              | chr19:19338200 | exac        | missense                 | p.Glu591Lys               | 0.0001  | 0         | 1            | 0        | 0    | 0       | 0        | 0           |                |
| -              | chr19:19338650 | novel       | missense                 | p.Thr741Pro               | -       | 1         | 0            | 1        | 2    | 0       | 0        | 0           |                |
| -              | chr19:19338747 | novel       | missense                 | p.Ala773Val               | -       | 2         | 0            | 0        | 2    | 0       | 0        | 0           |                |

| Genes          | Chr Position   | dbSNP ID    | Type     | Protein change | MAF     | NAFLD (N) | Controls (N) | Polyphen | SIFT | Provean | SNP & GO | Mut. Taster | Prob. Damaging |
|----------------|----------------|-------------|----------|----------------|---------|-----------|--------------|----------|------|---------|----------|-------------|----------------|
| <b>NCAN</b>    | chr19:19359574 | novel       | missense | p.Asn1235Asp   | -       | 0         | 1            | 1        | 0    | 0       | 0        | 2           |                |
| -              | chr19:19338942 | rs10426537  | missense | p.Ser838Asn    | 0.0008  | 0         | 1            | 1        | 0    | 0       | 0        | 0           |                |
| -              | chr19:19334995 | rs112606625 | missense | p.Arg214His    | 0.00003 | 0         | 1            | 0        | 0    | 0       | 0        | 2           |                |
| -              | chr19:19356209 | rs139427012 | missense | p.Arg1194Cys   | 0.00002 | 1         | 1            | 2        | 2    | 2       | 0        | 0           | yes            |
| -              | chr19:19338227 | rs143497000 | missense | p.Pro600Ala    | 0.00009 | 1         | 0            | 0        | 2    | 0       | 0        | 0           |                |
| -              | chr19:19337630 | rs149801377 | missense | p.Val470Leu    | 0.00001 | 0         | 1            | 0        | 2    | 0       | 0        | 0           |                |
| -              | chr19:19329924 | rs2228603   | missense | p.Pro92Ser     | 0.08214 | 25        | 18           | 1        | 0    | 0       | 0        | 0           |                |
| -              | chr19:19339337 | rs367609638 | missense | p.Glu970Lys    | 0.00006 | 1         | 0            | 0        | 0    | 0       | 0        | 0           |                |
| -              | chr19:19349218 | rs372689346 | missense | p.Asn1136Thr   | 0.00005 | 0         | 1            | 2        | 2    | 2       | 0        | 0           | yes            |
| -              | chr19:19329873 | rs373921518 | missense | p.Arg75Trp     | 0.00006 | 1         | 0            | 2        | 2    | 2       | 2        | 2           | yes            |
| -              | chr19:19349163 | rs375854561 | missense | p.Arg1118Cys   | 0.00016 | 1         | 0            | 2        | 2    | 2       | 0        | 2           | yes            |
| -              | chr19:19349187 | rs568608129 | missense | p.Val1126Ile   | 0.00005 | 1         | 0            | 0        | 0    | 0       | 0        | 0           |                |
| <b>PPP1R3B</b> | chr8:8998354   | rs201747156 | missense | p.Pro270Ser    | 0.00001 | 1         | 2            | 0        | 0    | 0       | 0        | 0           |                |
| -              | chr8:8999019   | rs3748140   | missense | p.Gly48Glu     | 0.0109  | 7         | 4            | 2        | 2    | 2       | 0        | 2           | yes            |
| -              | chr8:8999039   | rs61756425  | missense | p.Ser41Arg     | 0.013   | 9         | 3            | 0        | 0    | 0       | 0        | 0           |                |
| -              | chr8:8998959   | exac        | missense | p.Asn68Ser     | 0.00001 | 1         | 0            | 0        | 0    | 0       | 0        | 0           |                |
| <b>TM6SF2</b>  | chr19:19381932 | novel       | missense | p.Pro33Leu     | -       | 1         | 0            | 2        | 2    | 2       | 0        | 2           | yes            |
| -              | chr19:19381028 | rs117846705 | missense | p.Val119Ile    | 0.0004  | 1         | 0            | 0        | 0    | 0       | 0        | 0           |                |
| -              | chr19:19381881 | rs184254301 | missense | p.Ala50Val     | 0.002   | 1         | 0            | 1        | 0    | 0       | 0        | 0           |                |
| -              | chr19:19378859 | rs186811910 | missense | p.Pro216Leu    | 0.0004  | 0         | 1            | 2        | 2    | 2       | 0        | 2           | yes            |
| -              | chr19:19380513 | rs187429064 | missense | p.Leu156Pro    | 0.01    | 2         | 2            | 2        | 2    | 2       | 0        | 2           | yes            |
| -              | chr19:19375583 | rs188787025 | missense | p.Leu342Met    | 0.001   | 0         | 1            | 1        | 0    | 0       | na       | 2           |                |
| -              | chr19:19381885 | rs200492531 | missense | p.Val49Leu     | 0.002   | 0         | 2            | 0        | 0    | 0       | 0        | 0           |                |
| -              | chr19:19380514 | rs368135661 | missense | p.Leu156Val    | 0.00008 | 0         | 1            | 0        | 0    | 0       | 0        | 2           |                |
| -              | chr19:19379549 | rs58542926  | missense | p.Glu167Lys    | 0.08    | 25        | 13           | 2        | 0    | 0       | 0        | 0           |                |

Summary carrier counts and *in silico* prediction of functional effects are shown. Six exonic variants were not been previously reported in dbSNP and thus submitted to EXAC database (<http://exac.broadinstitute.org>).

**MAF:** Minor Allele Frequency evaluated by Exome Aggregation Consortium (ExAC) browser in European (Non-Finnish) population (<http://exac.broadinstitute.org>).

**Probably Damaging.** Variants were defined as Probably Damaging if reported as deleterious in at least three of five prediction tools. Frameshift, nonsense and splice region variants were considered as Probably Damaging.

*GCKR*, glucokinase (hexokinase 4) regulator gene, *LYPLAL1*, Lysophospholipase Like 1 gene, *PPP1R3B*, Protein Phosphatase 1 Regulatory Subunit 3B gene, *NCAN*, Neurocan gene, *TM6SF2*, Transmembrane 6 superfamily Member 2 gene.
